# Supplementary material for: Riok3 inhibits the antiviral immune response by facilitating TRIM40-mediated RIG-I and MDA5 degradation
Source: PubMed Central journal article supplement — Cell Rep. Author manuscript; Available in PMC 2021 Aug 14. (PMC8363743; doi:10.1016/j.celrep.2021.109272), 2021-06-22
Supplement: NIHMS1717850-supplement-1.pdf [file NIHMS1717850-supplement-1.pdf]

**Cell Reports, Volume 35**

**Supplemental information**

**Riok3 inhibits the antiviral**

**immune response by facilitating**

**TRIM40-mediated RIG-I and MDA5 degradation**

**Yong Shen, Kejun Tang, Dongdong Chen, Mengying Hong, Fangfang Sun, SaiSai Wang, Yuehai Ke, Tingting Wu, Ren Sun, Jing Qian, and Yushen Du**

Table S1: E3 ligases interacting with both RIG-I and MDA5 from PPI database, Related to Figure 5.

A systematic database and literature search was performed to identify the E3 ligases interacting with both RIG-I and MDA5. 32 candidates were found to be interacting with both proteins. After filtering the candidates without literature support and those that only performing K-63 ubiquitin. Three E3 ligases (TRIM40, Parkin and RNF125) were screened out.

| E3 ligases | Function in virology                                                                                                                       | Ubiquitination mode of RLRs | References                                                                                                                                  |
|------------|--------------------------------------------------------------------------------------------------------------------------------------------|-----------------------------|---------------------------------------------------------------------------------------------------------------------------------------------|
| RNF125     | Promote SeV via degrading RIG-I and MDA5<br>Inhibit SeV and NDV via repressing TRIM14                                                      | K-48                        | PMID: 17460044<br>PMID: 28476934                                                                                                            |
| RNF135     | Inhibit many viruses (e.g. VSV/SeV/IAV/IBV/ HCV) via activating RIG-I                                                                      | K-63                        | PMID: 19017631<br>PMID: 21147464<br>PMID: 23950712<br>PMID: 31006531<br>PMID: 31335993                                                      |
| RAD18      | Promote EBV infectivity via interacting with BPLF1<br>Inhibit HIV-1/MLV/VSV via binding DNA intermediates                                  | No report                   | PMID: 16710452<br>PMID: 24672041<br>PMID: 30935695                                                                                          |
| NSMCE1     |                                                                                                                                            | No report                   |                                                                                                                                             |
| SHPRH      |                                                                                                                                            | No report                   |                                                                                                                                             |
| Parkin     | Promote SeV/VSV via degrading RIG-I and MDA5                                                                                               | K-48                        | PMID: 32983119                                                                                                                              |
| TRIM4      | Inhibit VSV/SeV via activating RIG-I                                                                                                       | K-63                        | PMID: 24755855                                                                                                                              |
| TRIM5      | Inhibit retroviruses via multiple mechanisms                                                                                               | No report                   | PMID: 31312031                                                                                                                              |
| TRIM6      | Promote EboV via enhancing ubiquitination of VP35                                                                                          | No report                   | PMID: 28679761                                                                                                                              |
| TRIM8      | Inhibit HIV/IAV via maintaining IRF7 to induce IFN $\alpha/\beta$                                                                          | No report                   | PMID: 31799391                                                                                                                              |
| TRIM13     | Inhibit EMCV/IAV via inhibition of MDA5 activity                                                                                           | No report                   | PMID: 25008915                                                                                                                              |
| TRIM17     |                                                                                                                                            | No report                   |                                                                                                                                             |
| TRIM19     | Inhibit various viruses (e.g. HFV/IAV/EMCV/AAV/VSV/HIV-1) via multiple mechanisms                                                          | No report                   | PMID: 9444998<br>PMID: 11432836<br>PMID: 11907221<br>PMID: 16912307<br>PMID: 20702643<br>PMID: 21994459<br>PMID: 24586174<br>PMID: 26566030 |
| TRIM21     | Inhibit various viruses via multiple mechanisms                                                                                            | No report                   | PMID: 31555278                                                                                                                              |
| TRIM22     | Inhibit many viruses (e.g. HIV/HBV/IAV/HCV/RSV) via various mechanisms                                                                     | No report                   | PMID: 28782753<br>PMID: 32803897                                                                                                            |
| TRIM24     | Inhibit VSV via mediating K63-linked TRAF3 ubiquitination<br>Inhibit retroviral transcription via forming a complex with TRIM28 and TRIM33 | No report                   | PMID: 32324863<br>PMID: 32932986                                                                                                            |
| TRIM25     | Inhibit various viruses via mediating K63-linked                                                                                           | K-63                        | PMID: 17392790                                                                                                                              |

|        |                                                                                                                                                                  |           |                                                                                                          |
|--------|------------------------------------------------------------------------------------------------------------------------------------------------------------------|-----------|----------------------------------------------------------------------------------------------------------|
|        | ubiquitination of RIG-I                                                                                                                                          |           | PMID: 29018447                                                                                           |
|        | Inhibit various viruses via other mechanisms like positively regulating MDA5-MAVS axis, binding viral RNAs and ribonucleoproteins                                |           | PMID: 26299329<br>PMID: 27528750                                                                         |
| TRIM27 | Promote HCV via inhibiting IRF3 and NF- $\kappa$ B pathways<br>Inhibit HSV-1 via degrading ICP0                                                                  | No report | PMID: 25320289<br>PMID: 30847745                                                                         |
| TRIM28 | Inhibit M-MLV via binding to PBS<br>Inhibit M-MLV via interacting with YY1<br>Promote HIV-1 latency via SUMOylating CDK9 and inhibiting P-TEFb                   | No report | PMID: 17923087<br>PMID: 29407374<br>PMID: 30652970                                                       |
| TRIM31 | Inhibit VSV and SeV via activating MAVS<br>Inhibit HBV via degrading HBx                                                                                         | No report | PMID: 27992402<br>PMID: 31825835                                                                         |
| TRIM32 | Inhibit HSV-1/SeV via promoting K63-linked polyubiquitination of STING<br>Inhibit IAV via degrading PB1<br>Inhibit HPAIV via interacting with STING              | No report | PMID: 22745133<br>PMID: 26057645<br>PMID: 28954259<br>PMID: 32184788                                     |
| TRIM33 | Inhibit HIV-1 infection via preventing provirus formation<br>Inhibit retroviral transcription via forming a complex with TRIM24 and TRIM28                       | No report | PMID: 30804369<br>PMID: 32932986                                                                         |
| TRIM34 | Inhibit HIV via targeting N74D capsids                                                                                                                           | No report | PMID: 32282853                                                                                           |
| TRIM38 | Promote VSV via degrading NAP1<br>Inhibit DNA viruses (e.g. HSV-1/VV/ECTV) via sumoylation of cGAS<br>Inhibit EMCV/NDV/VSV/SeV via sumoylation of RIG-I and MDA5 | No report | PMID: 22539786<br>PMID: 27637147<br>PMID: 28250012                                                       |
| TRIM39 | Inhibit iridovirus and nodavirus via repressing viral gene transcription                                                                                         | No report | PMID: 26784918                                                                                           |
| TRIM40 | Promote VSV/SeV/EMCV via degrading RIG-I and MDA5                                                                                                                | K-48      | PMID: 29117565                                                                                           |
| TRIM56 | Inhibit various viruses (e.g. IAV/YFV/ZIKV/BVDV/DENV2/SeV/HSV-1) via multiple mechanisms                                                                         | No report | PMID: 21289118<br>PMID: 22948160<br>PMID: 25253338<br>PMID: 26889027<br>PMID: 29426904<br>PMID: 31251739 |
| TRIM59 | Inhibit PRRSV via interacting with nsp11                                                                                                                         | No report | PMID: 31683196                                                                                           |
| TRIM62 | Inhibit VSV/MLV via activating TRIF-TAK1 signaling                                                                                                               | No report | PMID: 23077300                                                                                           |
| TRIM65 | Inhibit EMCV via K63-linked ubiquitination of MDA5                                                                                                               | K-63      | PMID: 28031478                                                                                           |
| TRIM69 | Inhibit dengue virus via degrading nonstructural protein 3<br>Inhibit VSV <sub>IND</sub> via binding phosphoprotein (P)                                          | No report | PMID: 30142214<br>PMID: 31578292                                                                         |
| TRIM71 |                                                                                                                                                                  | No report |                                                                                                          |
